# Supplementary material for: Anopheles mosquitoes may drive invasion and transmission of Mayaro virus across geographically diverse regions
Source: PLoS Negl Trop Dis. 2018 Nov 7;12(11):e0006895. doi: 10.1371/journal.pntd.0006895 (PMC6242690; doi:10.1371/journal.pntd.0006895)
Supplement: S1 Table — (XLSX) [file pntd.0006895.s001.xlsx]

## Sheet: Ae. aegypti
	Be Ar 505411								Be An 343102
	Body 7dpi	Legs 7 dpi	Saliva 7 dpi		Body 14dpi	Legs 14 dpi	Saliva 14 dpi		Body 7dpi	Legs 7 dpi	Saliva 7 dpi		Body 14dpi	Legs 14 dpi	Saliva 14 dpi
	8830000	500000	2000		4330000	0	0		917000	117000	0		0	0	0
	6670	0	0		8330	0	0		0	0	0		0	0	0
	40000	0	0		0	0	0		0	0	0		0	0	0
	80000	6670	0		6330000	117000	0		0	0	0		0	0	0
	28300	233000	0		0	0	0		0	0	0		0	0	0
	833000	0	0		0	0	0		0	0	0		0	0	0
	7500000	150000	0		0	0	0		0	0	0		0	0	0
	1330000	833000	0		0	0	0		0	0	0		0	0	0
	7170000	83300	0		0	0	0		0	0	0		0	0	0
	7330000	233000	0		7170000	35000	0		0	0	0		0	0	0
	25000	0	0		0	0	0		0	0	0		0	0	0
	6000000	200000	0		3000000	66700	0		0	0	0		0	0	0
	0	0	0		1670000	16700	0		0	0	0		0	0	0
	6000000	833000	0		0	0	0		0	0	0		0	0	0
	0	0	0		6500000	31700	0		0	0	0		0	0	0
	0	0	0		3170000	10000	0		0	0	0		0	0	0
	3830000	1330000	0		0	0	0		0	0	0		0	0	0
	38300	0	0		12200000	16700	0		0	0	0		0	0	0
	1170000	1500000	0		0	0	0		0	0	0		0	0	0
	4500000	233000	0		3830000	83300	0		167	0	0		0	0	0
	3330000	3500000	0		0	0	0		0	0	0		0	0	0
	45000	13300	0		3330000	38300	0		0	0	0		0	0	0
	1830000	1330000	0		150000	0	0		0	0	0		0	0	0
	1830000	600000	0		1170000	10000	0		0	0	0		0	0	0
	0	0	0		0	0	0		0	0	0		0	0	0
	3000000	1500000	0		0	0	0		0	0	0		0	0	0
	833000	683000	0		0	0	0		0	0	0		0	0	0
	350000	0	0		3500000	20000	0		0	0	0		0	0	0
	7500000	833000	0		2330000	21700	0						0	0	0

## Sheet: An. stephensi
	Be Ar 505411								Be An 343102
	Body 7dpi	Legs 7 dpi	Saliva 7 dpi		Body 14dpi	Legs 14 dpi	Saliva 14 dpi		Body 7dpi	Legs 7 dpi	Saliva 7 dpi		Body 14dpi	Legs 14 dpi	Saliva 14 dpi
	217000	33300	0		66700	1830	0		150000	83300	0		433000	15000	0
	23300	6670	0		66700	15000	0		0	0	0		26700	2170	0
	150000	33300	0		0	0	0		167	0	0		31700	2000	0
	383000	117000	0		0	0	0		16700	16700	0		467000	10000	0
	0	0	0		50000	500	0		1200000	250000	0		267000	26700	0
	533000	16700	0		83300	2500	0		717000	100000	0		16700	0	0
	3330	66700	0		167000	66700	0		733000	133000	0		1270000	200000	0
	450000	150000	0		117000	13300	0		3330	1670	0		383000	11700	0
	0	0	0		117000	3330	0		6000000	700000	0		483000	10000	0
	0	0	0		233000	66700	0		367000	83300	0		0	0	0
	1050000	1670	0		383000	15000	0		250000	10000	0		467000	11700	0
	867000	16700	0		33300	16700	0		100000	50000	0		717000	6330	0
	183000	100000	0		133000	6670	0		0	0	0		533000	1670	0
	6670	0	0		83300	25000	0		850000	50000	200		367000	11700	0
	8330	33300	0		150000	8330	0		3330000	700000	33.3		667000	20000	0
	150000	33300	0		283000	50000	0		617000	58300	0		633000	13300	0
	567000	150000	0		83300	11700	0		717000	183000	0		850000	6670	0
	300000	117000	0		117000	10000	0		0	0	0		633000	11700	0
	0	0	0		0	0	0		800000	117000	0		383000	167	0
	533000	65000	0		100000	1670	0		1330000	1050000	0		550000	10000	0
	0	0	0		217000	1670	0		50000	66700	0		233000	4670	0
	950000	133000	133		0	0	0		1120000	417000	0		117000	167	0
	400000	16700	0		267000	5000	0		417000	183000	0		50000	500	0
	1170000	83300	100		183000	50000	0		667000	633000	0		0	0	0
	0	0	0		317000	3830	0		300000	233000	0		0	0	0
	633000	33300	0		0	1670	0		10000	1330	0		367000	21700	0
	0	0	0		317000	5000	0		2330000	867000	0		38300	833	0
	600000	100000	0		83300	5000	0		1200000	600000	100		0	0	0
	0	0	0		533000	26700	0
	517000	183000	0		3000	1170	0
	50000	66700	33.3		467000	83300	0
	0	0	0		0	0	0
	0	0	0		633000	6670	0
	550000	83300	0		150000	5000	0
	133000	117000	0		1330	333	0
					0	0	0
					50000	10000	0
					400000	20000	0
					0	0	0
					0	0	0
					367000	36700	0

## Sheet: An. gambiae
	Be Ar 505411								Be An 343102
	Body 7dpi	Legs 7 dpi	Saliva 7 dpi		Body 14dpi	Legs 14 dpi	Saliva 14 dpi		Body 7dpi	Legs 7 dpi	Saliva 7 dpi		Body 14dpi	Legs 14 dpi	Saliva 14 dpi
	0	0	0		11700	8330	0		4330	0	0		1220000	133000	500
	500	0	0		60000	20000	167		2330	0	0		95000	10000	600
	167	0	0		30000	1500	133		167	0	0		56700	11700	133
	0	0	0		53300	13300	0		667	0	0		66700	35000	33.3
	500	0	0		56700	13300	0		0	0	0
	0	0	0		88300	5670	167		0	0	0
	167	167	0						5000	13300	0
	0	0	0						0	0	0
	333	2830	0						1670	0	0
									167	0	0
									1670	2330	0
									333	0	0

## Sheet: An. quadrimaculatus
	Be Ar 505411								Be An 343102
	Body 7dpi	Legs 7 dpi	Saliva 7 dpi		Body 14dpi	Legs 14 dpi	Saliva 14 dpi		Body 7dpi	Legs 7 dpi	Saliva 7 dpi		Body 14dpi	Legs 14 dpi	Saliva 14 dpi
	0	0	0		1670	0	0		0	0	0
	333	0	0		333	167	0		2000000	233000	100
	0	0	0		1000	0	0		0	0	0
	667	0	0		8330	0	0		0	0	0
	500	167	33.3		167	0	0		0	0	0
	500	0	0		167000	33300	0
	4330000	2000000	0		283000	50000	0
	500	0	0		1670	0	0
	2670	0	0		500	0	0
	333	0	0		2170	0	0
	0	0	0
	833	0	0
	833	0	0
	167	0	0

## Sheet: An. freeborni
	Be Ar 505411								Be An 343102
	Body 7dpi	Legs 7 dpi	Saliva 7 dpi		Body 14dpi	Legs 14 dpi	Saliva 14 dpi		Body 7dpi	Legs 7 dpi	Saliva 7 dpi		Body 14dpi	Legs 14 dpi	Saliva 14 dpi
	0	0	0		500	0	0		983000	683000	66.7		0	0	0
	3830	0	0		0	0	0		0	0	0
	0	0	0		200000	8330	0		0	0	0
	0	0	0		283000	217000	0		0	0	0
	0	0	0						0	0	0
	0	0	0						567000	183000	400
									83300	417000	0
									0	0	0

## Sheet: Cx. quinquefasciatus
	Be Ar 505411								Be An 343102
	Body 7dpi	Legs 7 dpi	Saliva 7 dpi		Body 14dpi	Legs 14 dpi	Saliva 14 dpi		Body 7dpi	Legs 7 dpi	Saliva 7 dpi		Body 14dpi	Legs 14 dpi	Saliva 14 dpi
	0	0	0		0	0	0		0	0	0		0	0	0
	117000	13300	0		0	0	0		0	0	0		0	0	0
	0	0	0		0	0	0		0	0	0		0	0	0
	0	0	0		0	0	0		0	0	0		0	0	0
	0	0	0		0	0	0		0	0	0		0	0	0
	0	0	0		0	0	0		0	0	0		0	0	0
	0	0	0		0	0	0		0	0	0		0	0	0
	0	0	0		0	0	0		0	0	0		0	0	0
	0	0	0		0	0	0		0	0	0		0	0	0
	0	0	0		0	0	0		0	0	0		0	0	0
	0	0	0		0	0	0						0	0	0
	0	0	0		0	0	0
	0	0	0		0	0	0
	0	0	0		0	0	0
	0	0	0		167000	2170	0
	0	0	0		0	0	0
	0	0	0		133000	5330	0
	0	0	0		0	0	0
	0	0	0		0	0	0
					0	0	0
